# Supplementary material for: Surveillance of Legionella pneumophila: Detection in Public Swimming Pool Environment
Source: MDPI journal article supplement (doi:10.3390/microorganisms10122429), 2022-12-08
Supplement: s1 [file s1]

(a) Outdoor swimming pools (N = 2233)

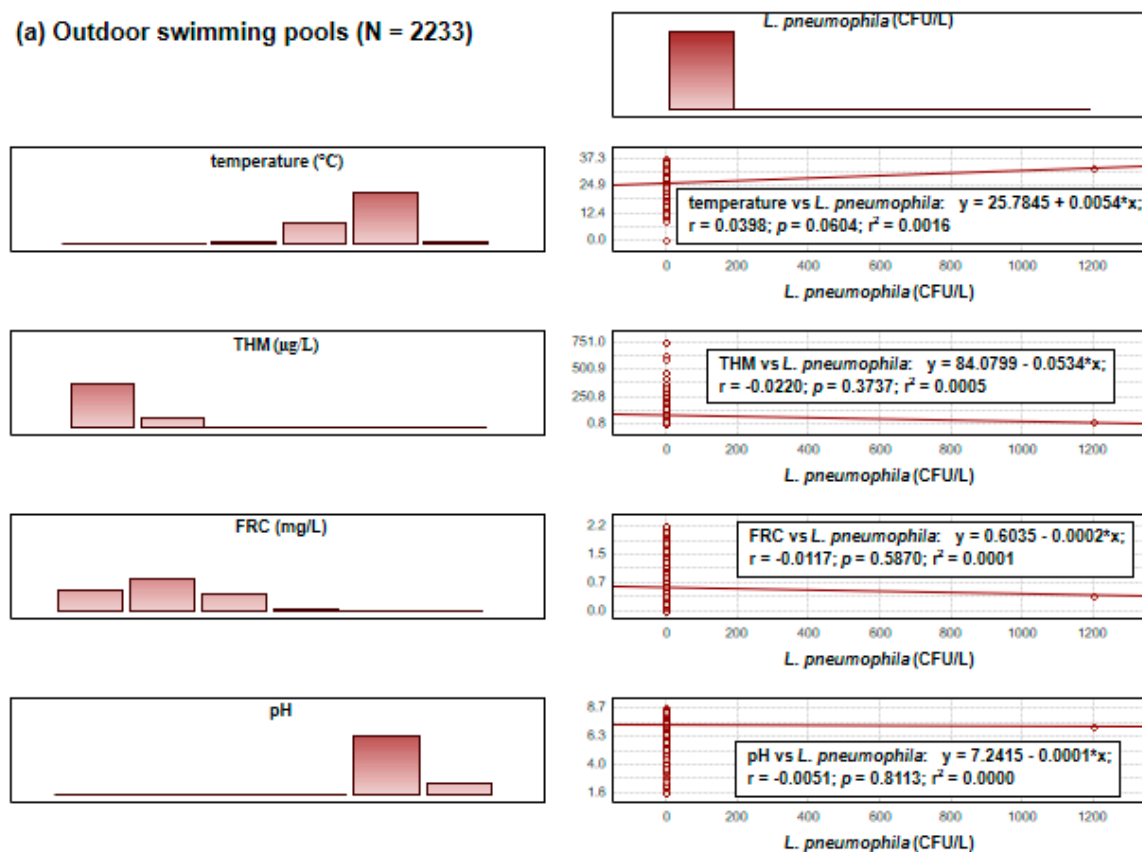

(b) Indoor swimming pools (N = 2354)

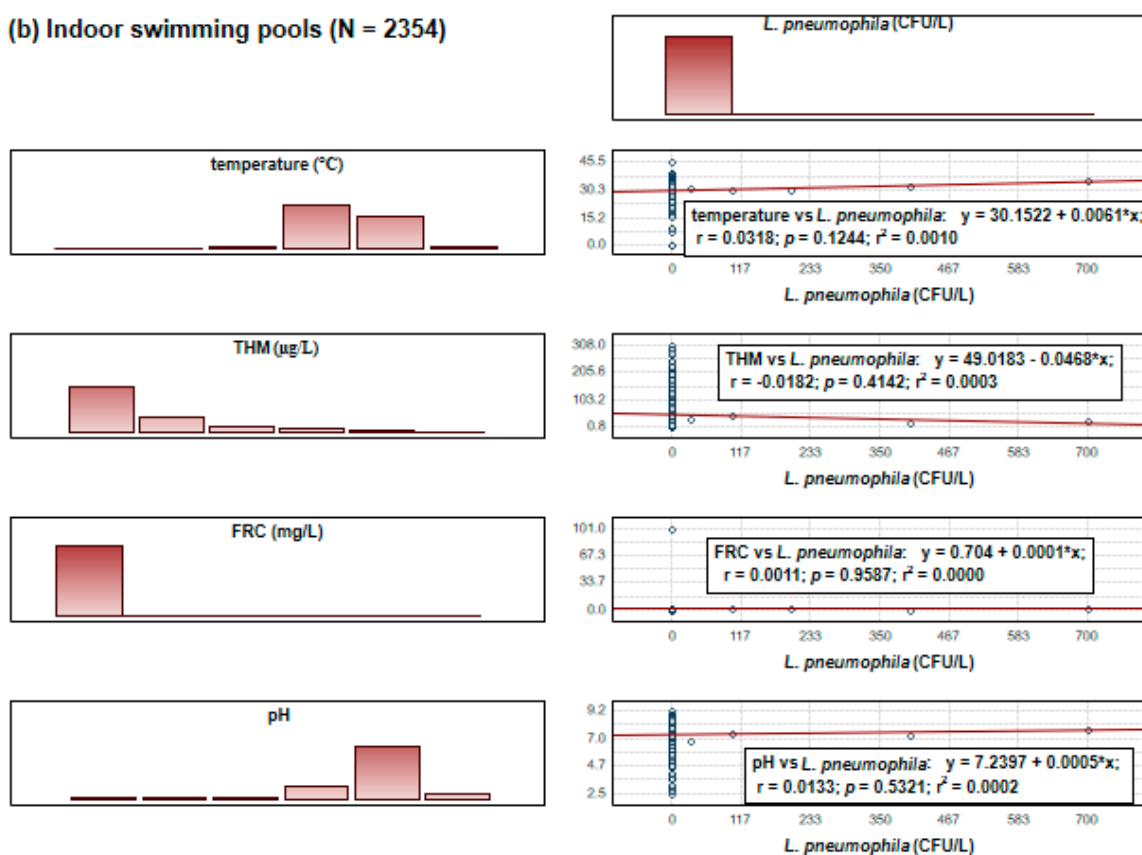

(c) Recreational swimming pools (N = 2833)

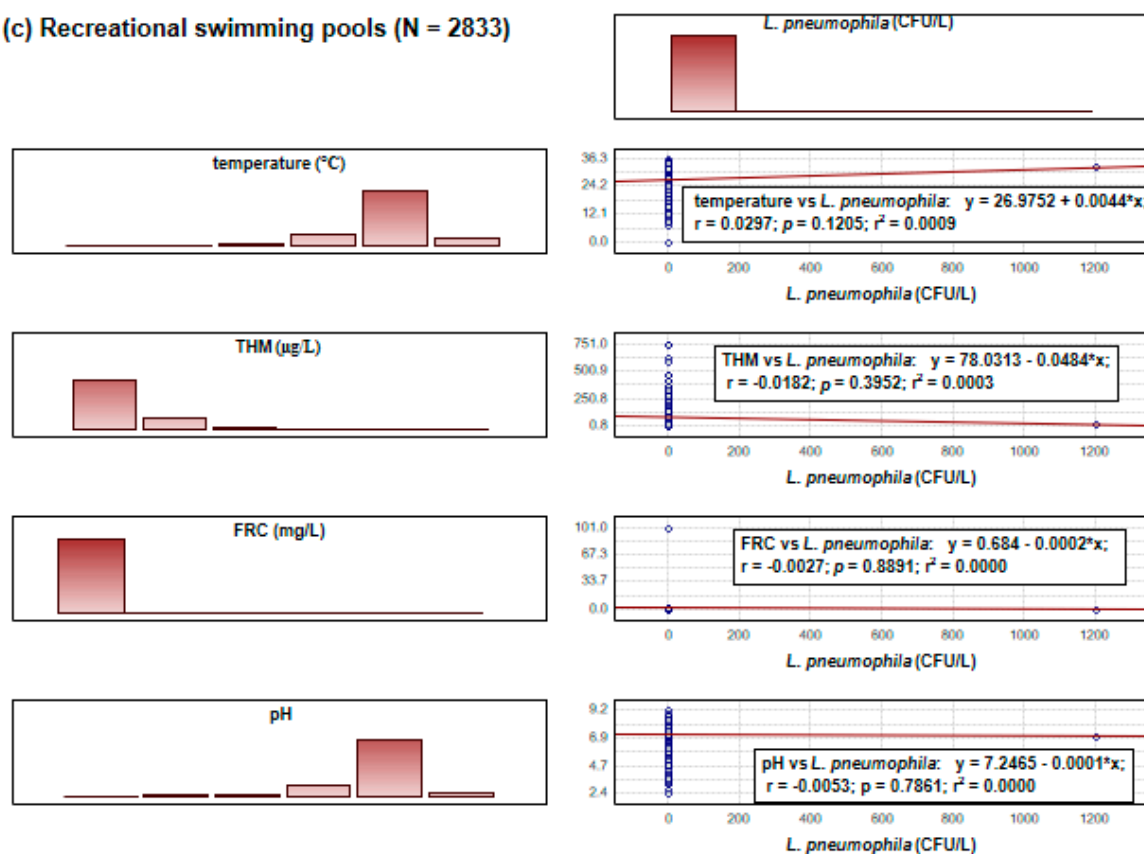

(d) Hot tubs (N = 966)

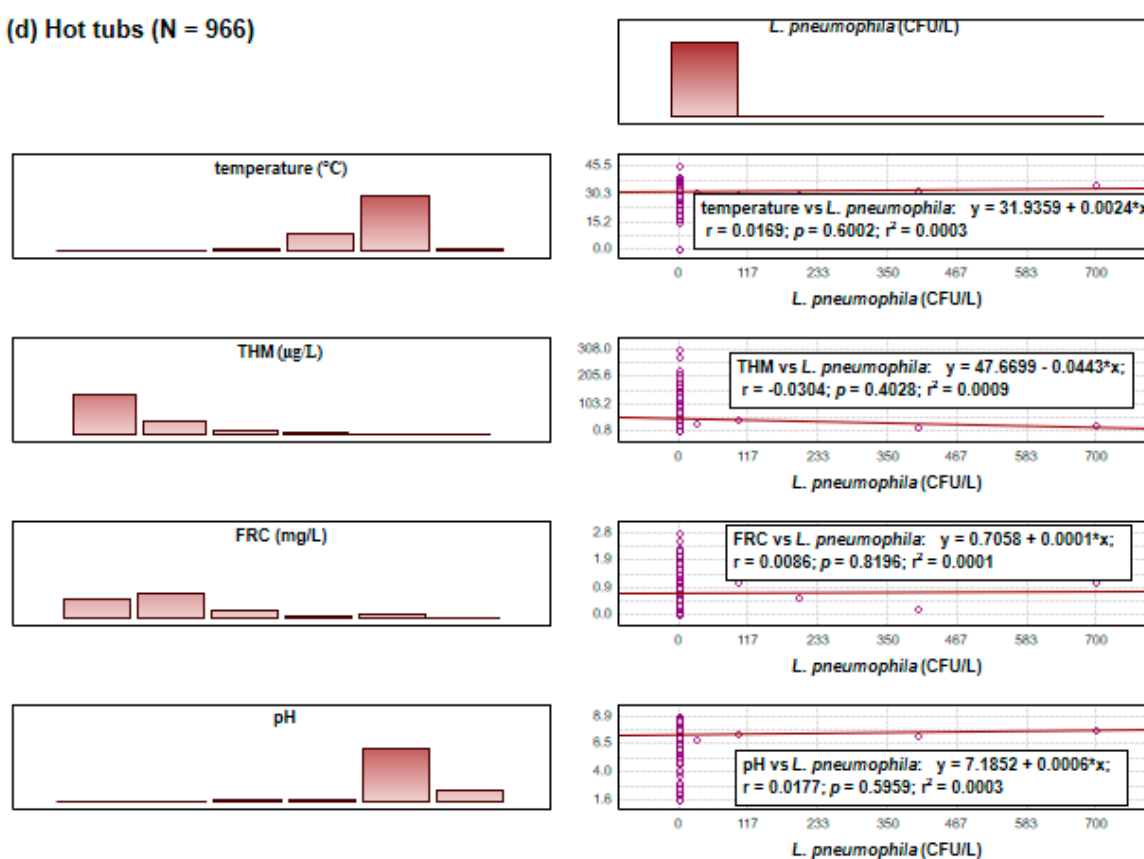

(e) Swimming pools with saltwater (N = 1478)

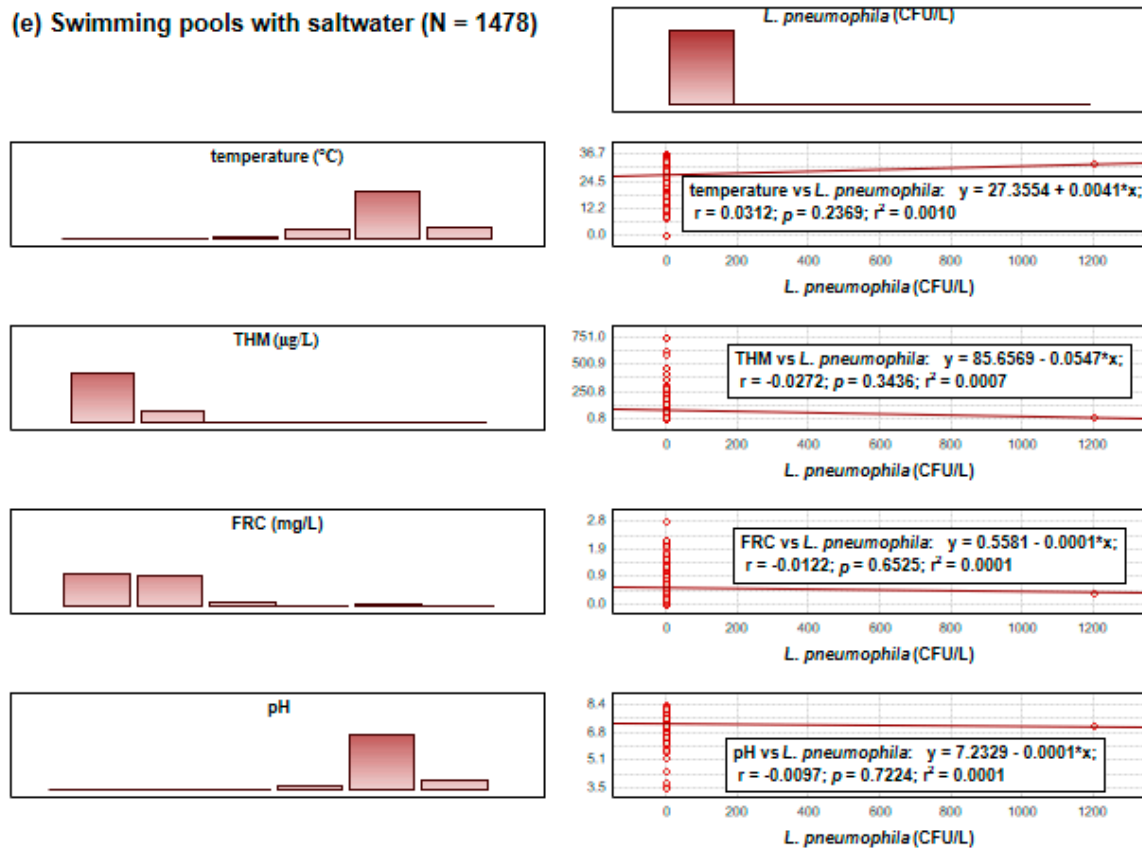

(f) Swimming pools with freshwater (N = 3109)

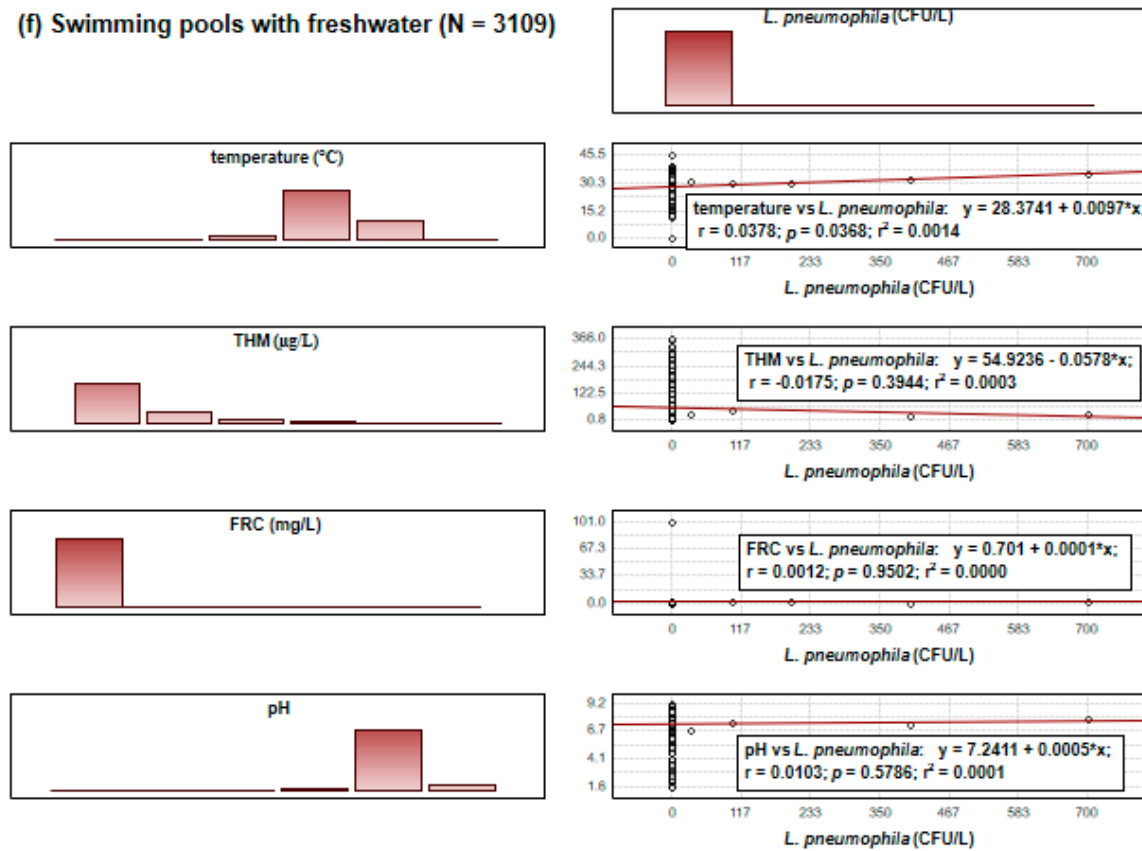

**Figure S1.** Correlations between *L. pneumophila* and physico-chemical characteristics (temperature, pH, THM, FRC) of waters in: a) outdoor, b) indoor, c) recreational swimming pools, d) hot tubs, e) swimming pools with salt water, and f) swimming pools with fresh water.

(a) Outdoor swimming pools (N = 2233)

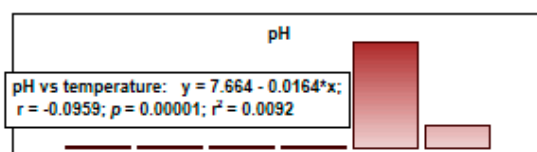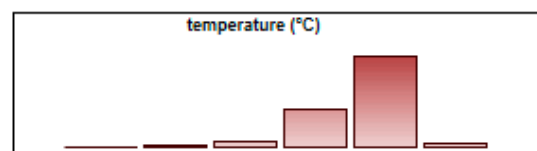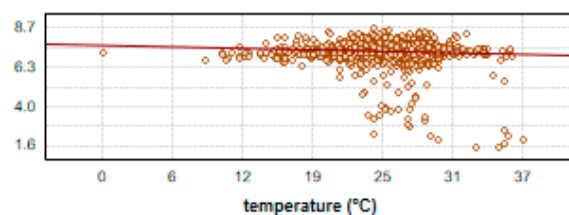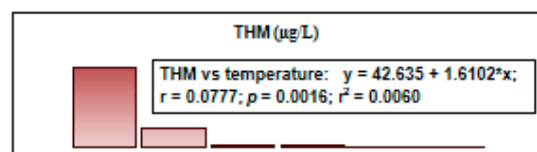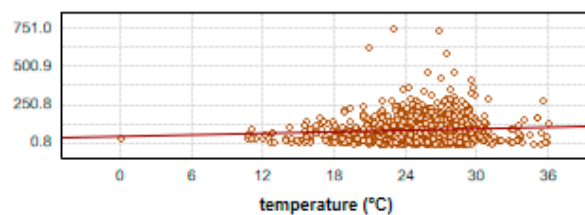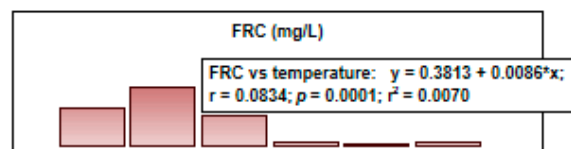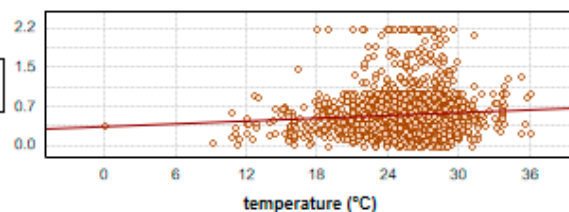

(b) Indoor swimming pools (N = 2354)

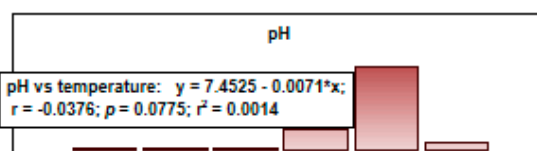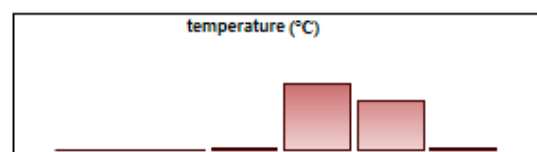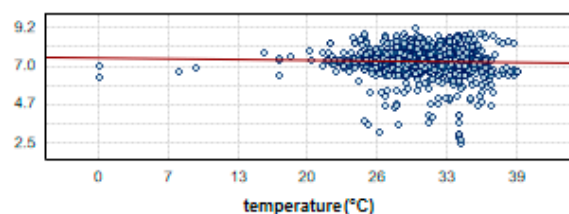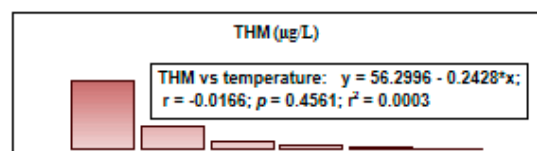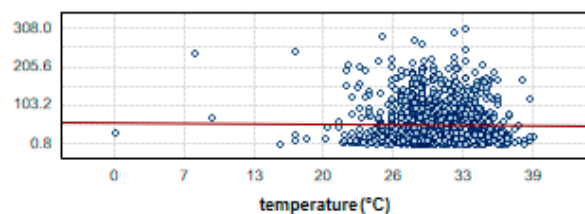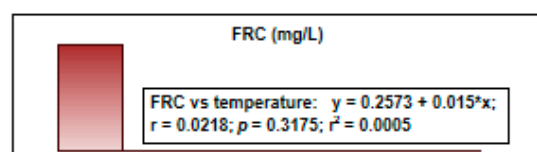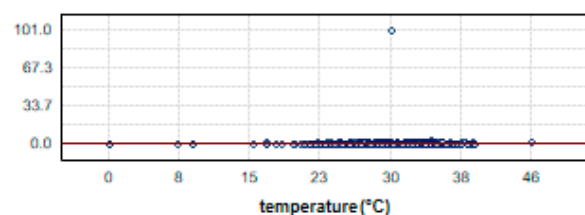

(c) Recreational swimming pools (N = 2833)

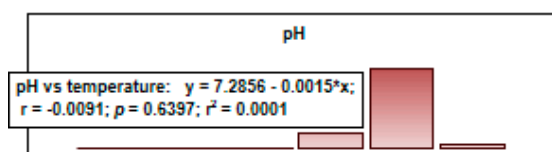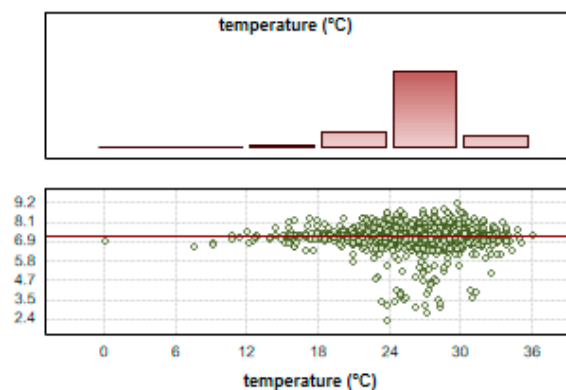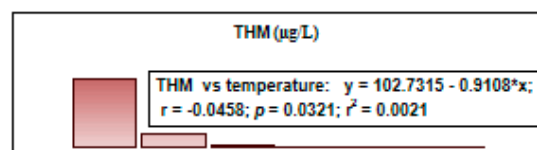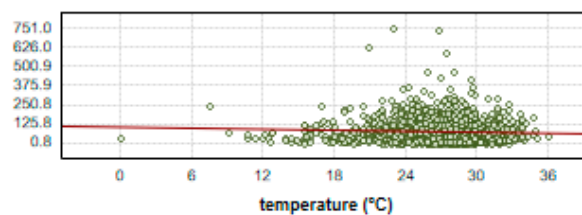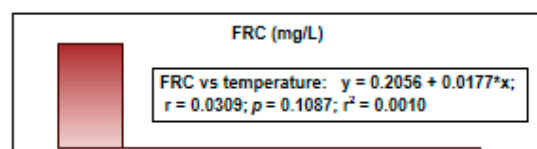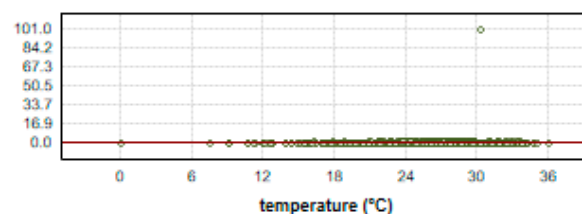

(d) Hot tubs (N = 966)

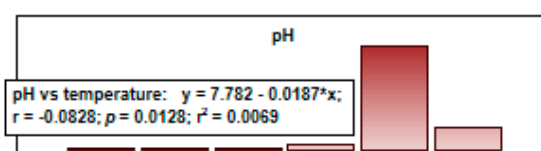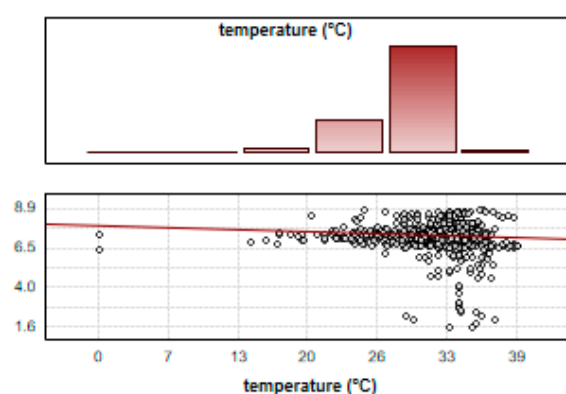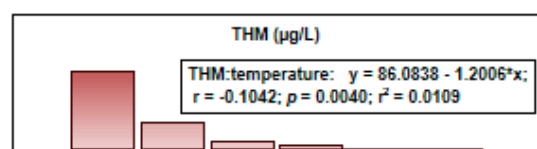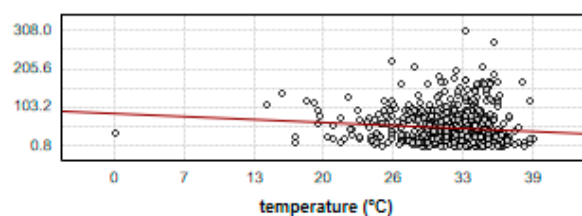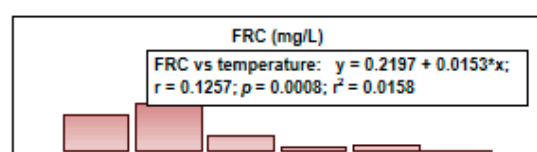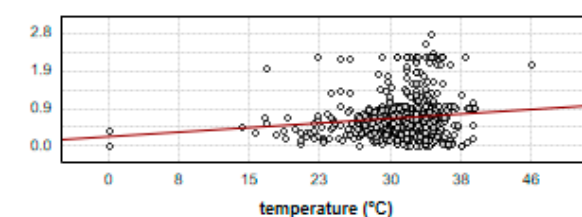

(e) Swimming pools with saltwater (N = 1478)

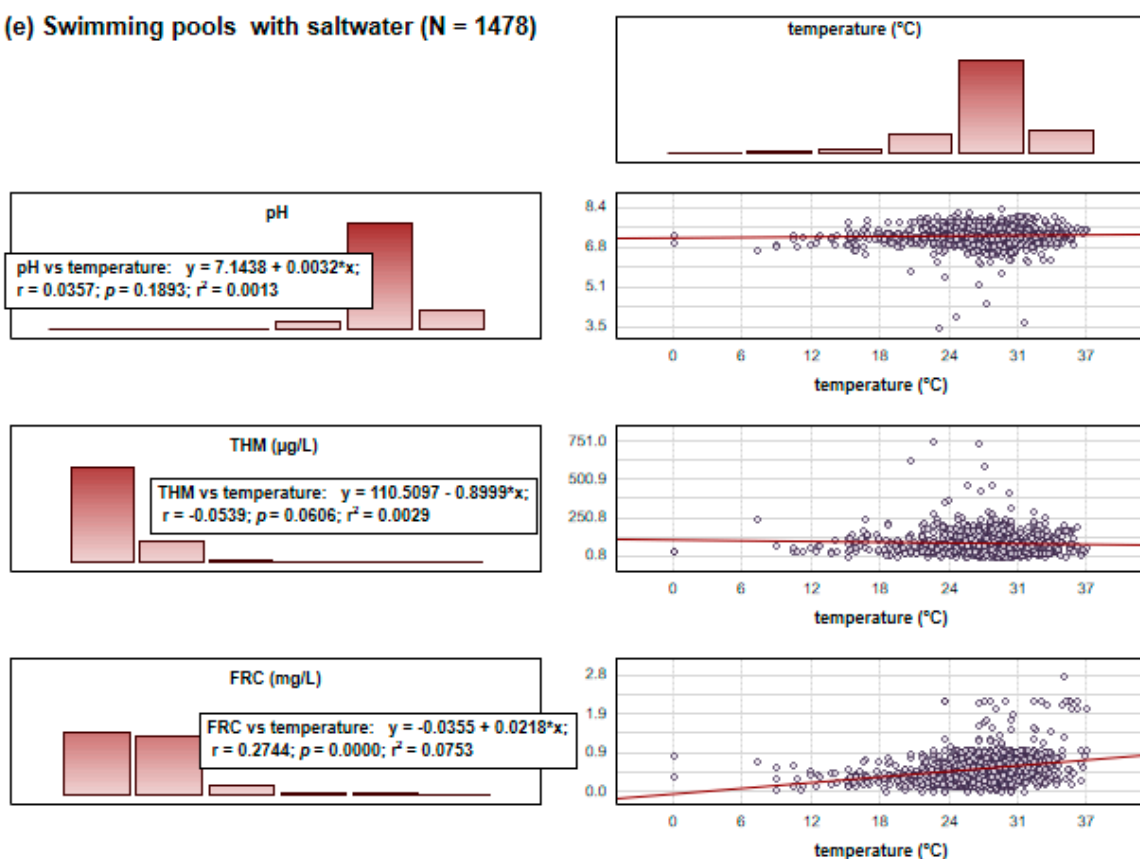

(f) Swimming pools with freshwater (N = 3109)

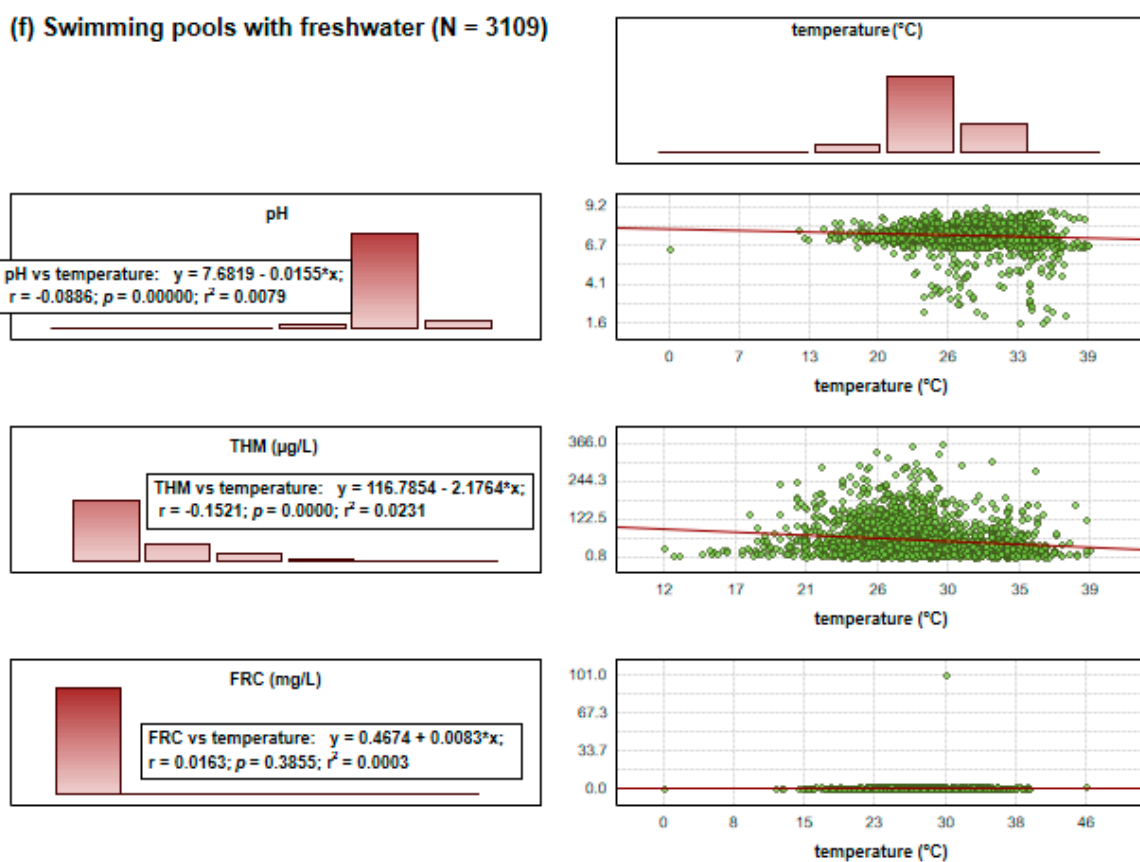

**Figure S2.** Correlations between temperature and physico-chemical characteristics (pH, THM, FRC) of waters in: a) outdoor, b) indoor, c) recreational swimming pools, d) hot tubs, e) swimming pools with salt water, and f) swimming pools with fresh water.

**Table S1.** Eigenvector values and variable contributions for analyzed swimming water pools' physico-chemical parameters (temperature (°C), pH, trihalomethanes (THM; µg/L), free residual chlorine (FRC; mg/L)), and bacteria: *Legionella pneumophila* (CFU/L), depending on whether it was an indoor or outdoor swimming pool and the type of swimming pool (children's, recreational, hot tub, or sports/Olympic), as determined by principal component analysis (PCA) with first three main components (PC 1, PC 2 and PC 3). (N<sub>pool data</sub> = 4587; N<sub>outdoor</sub> = 2233; N<sub>indoor</sub> = 2354).

| Variable              | Eigenvector spreadsheet |       |       |
|-----------------------|-------------------------|-------|-------|
|                       | PC 1                    | PC 2  | PC 3  |
| temperature           | 0.43                    | -0.43 | 0.29  |
| pH                    | -0.45                   | 0.19  | -0.60 |
| THM                   | 0.53                    | 0.30  | -0.41 |
| FRC                   | 0.57                    | 0.21  | -0.31 |
| <i>L. pneumophila</i> | 0.01                    | -0.80 | -0.53 |
|                       | Variable contribution   |       |       |
|                       | PC 1                    | PC 2  | PC 3  |
| temperature           | 0.19                    | 0.19  | 0.08  |
| pH                    | 0.20                    | 0.04  | 0.37  |
| THM                   | 0.29                    | 0.09  | 0.17  |
| FRC                   | 0.33                    | 0.04  | 0.10  |
| <i>L. pneumophila</i> | 0.01                    | 0.64  | 0.28  |

**Table S2.** Eigenvector values and variable contributions for analyzed swimming water pools' physico-chemical parameters (temperature (°C), pH, trihalomethanes (THM; µg/L), free residual chlorine (FRC; mg/L)), and bacteria: *Legionella pneumophila* (CFU/L), depending on water in swimming pool (saltwater or freshwater) and type of swimming pool (children's, recreational, hot tub, or sports/Olympic), as determined by principal component analysis (PCA) with first three main components (PC 1, PC 2 and PC 3). (N<sub>pool data</sub> = 4587; N<sub>saltwater</sub> = 1478; N<sub>indoor</sub> = 3109).

| Variable              | Eigenvector spreadsheet |       |       |
|-----------------------|-------------------------|-------|-------|
|                       | PC 1                    | PC 2  | PC 3  |
| temperature           | 0.45                    | -0.62 | -0.02 |
| pH                    | -0.32                   | -0.55 | -0.26 |
| THM                   | 0.48                    | 0.49  | -0.02 |
| FRC                   | 0.68                    | -0.19 | -0.08 |
| <i>L. pneumophila</i> | -0.01                   | -0.17 | 0.96  |

|                       | Variable contribution |      |      |
|-----------------------|-----------------------|------|------|
|                       | PC 1                  | PC 2 | PC 3 |
| temperature           | 0.20                  | 0.39 | 0.01 |
| pH                    | 0.10                  | 0.31 | 0.07 |
| THM                   | 0.23                  | 0.24 | 0.01 |
| FRC                   | 0.47                  | 0.04 | 0.01 |
| <i>L. pneumophila</i> | 0.01                  | 0.03 | 0.93 |
